# Supplementary material
Source: bioRxiv or medRxiv preprint supplement (https://www.biorxiv.org/highwire/filestream/71666/field_highwire_adjunct_files/0/198275-1.pdf)
Supplement: Supplementary file [file 198275-1.pdf]

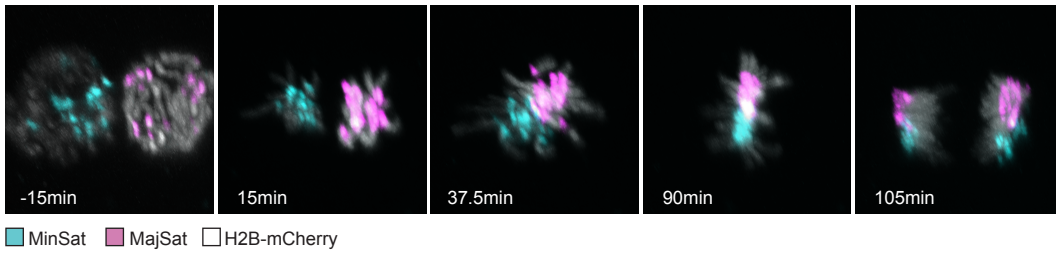

Supplementary Figure 1

**A**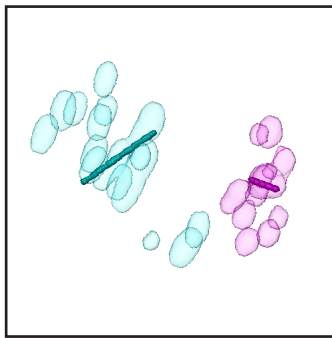

PatChr MatChr

**B**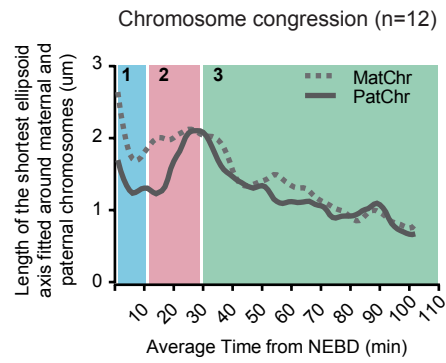**C**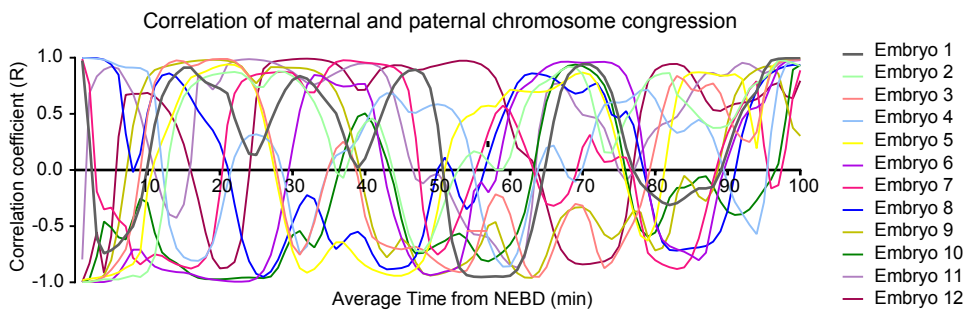**D**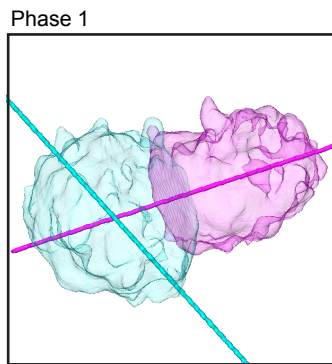

PatSpd MatSpd

**E**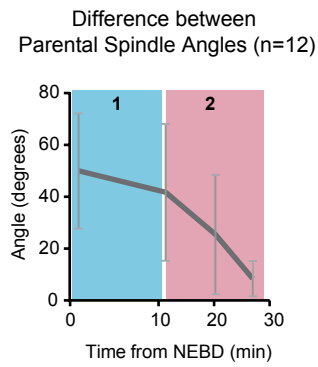

Supplementary Figure 2

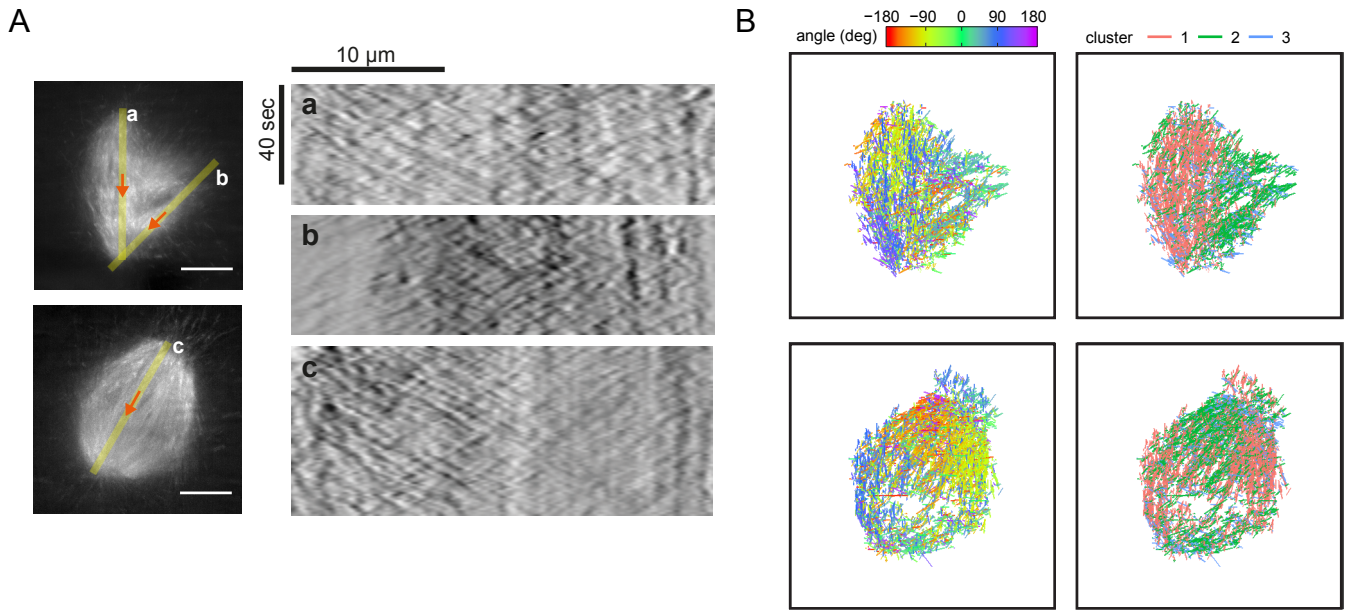

Supplementary Figure 3

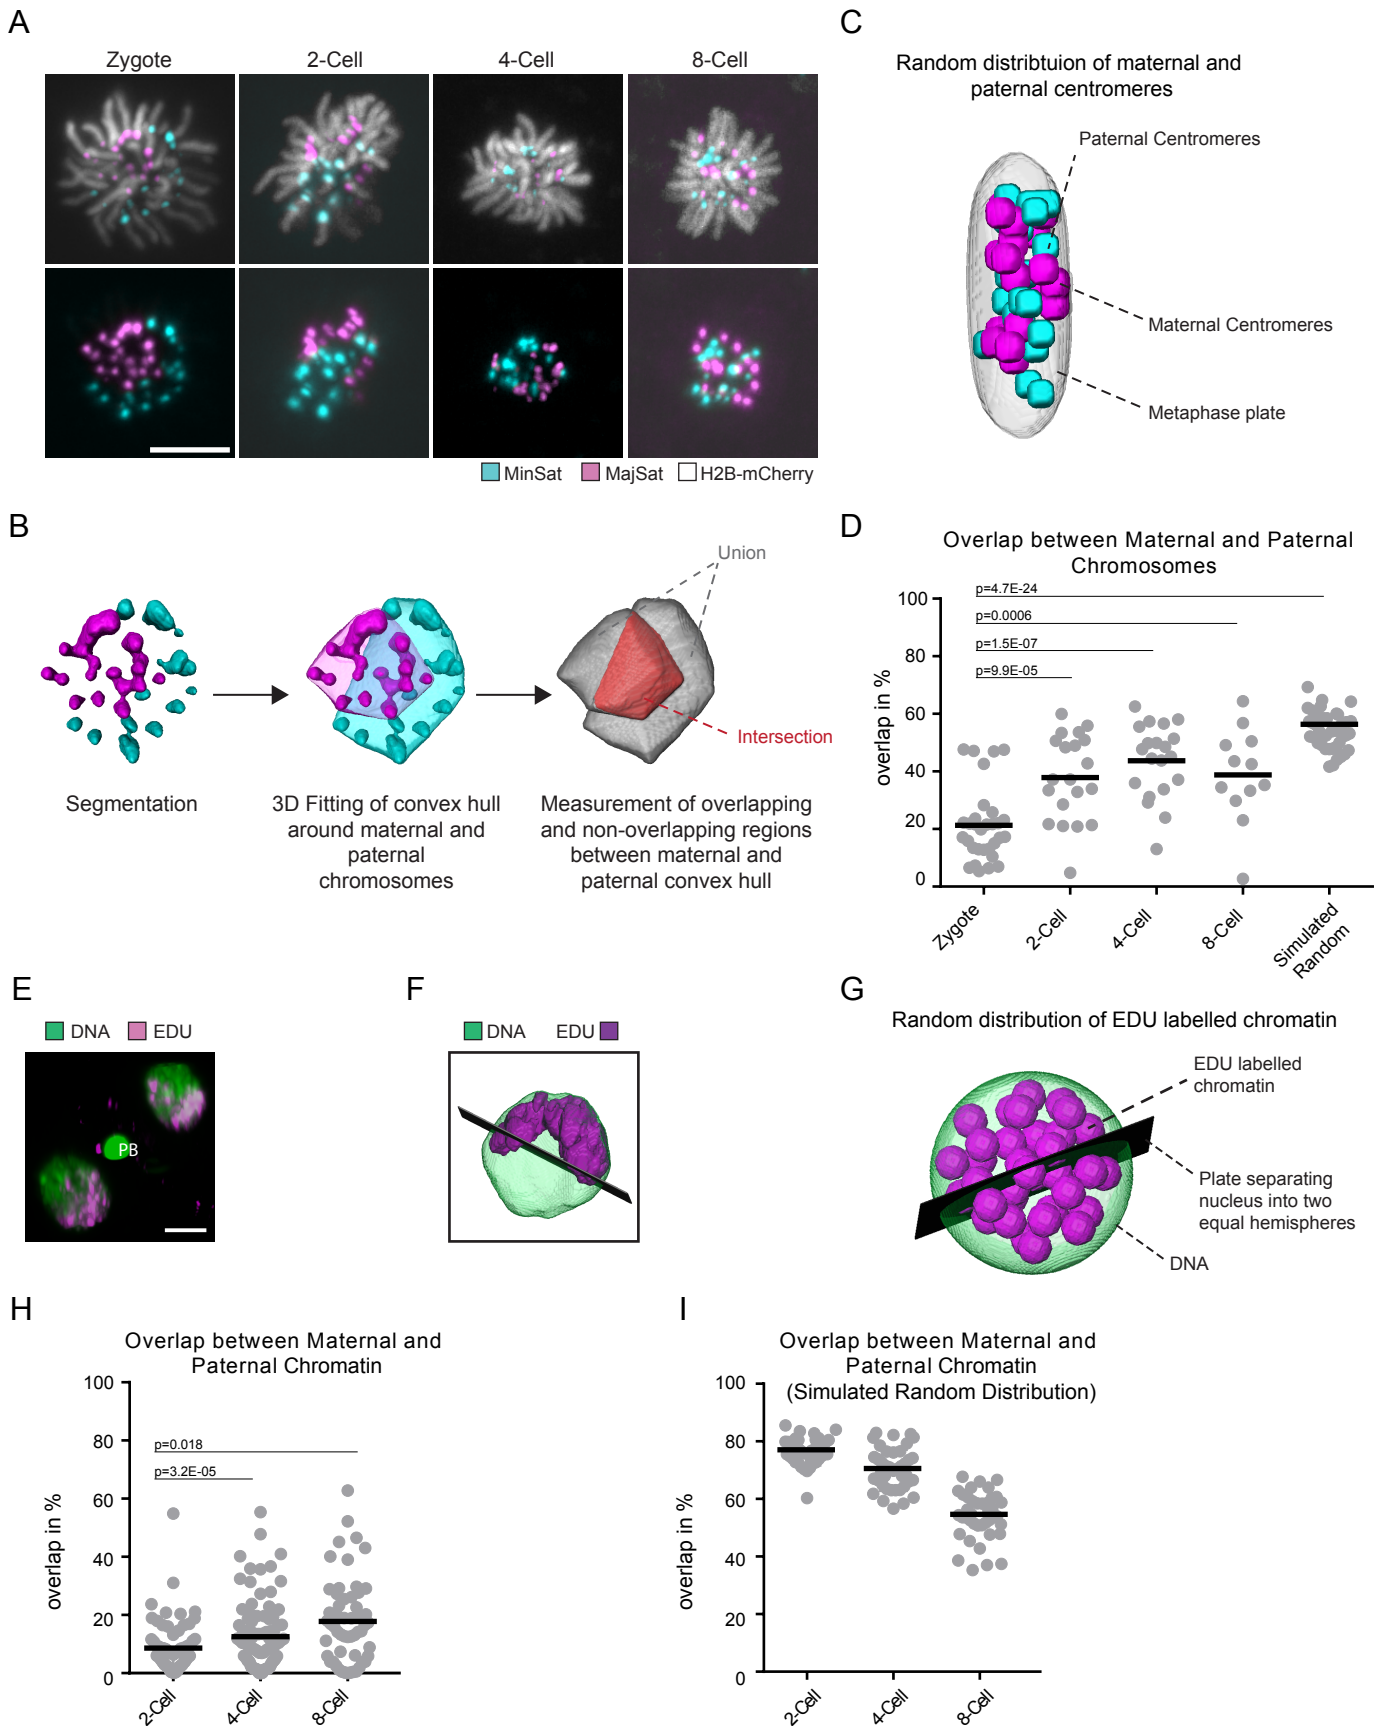

Supplementary Figure 4



A

Phase 1: Microtubule balls      Phase 2: Individual bi-polar spindles around maternal and paternal chromatin

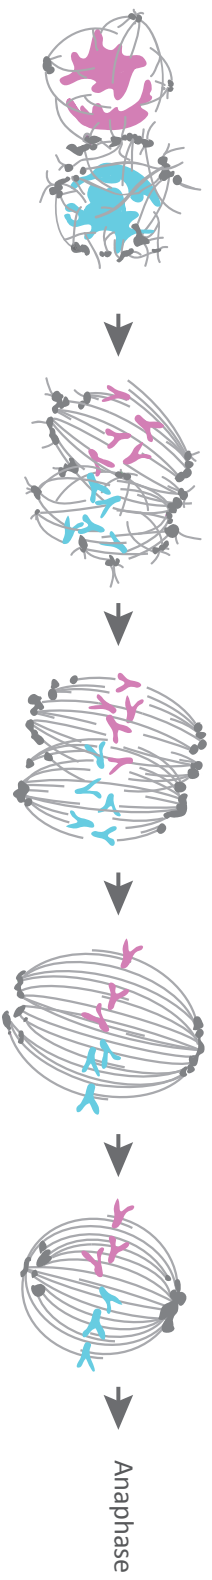

B

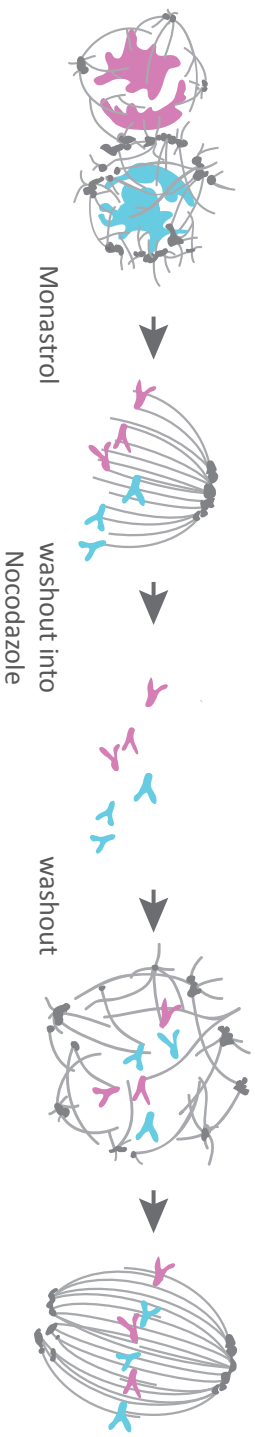

C

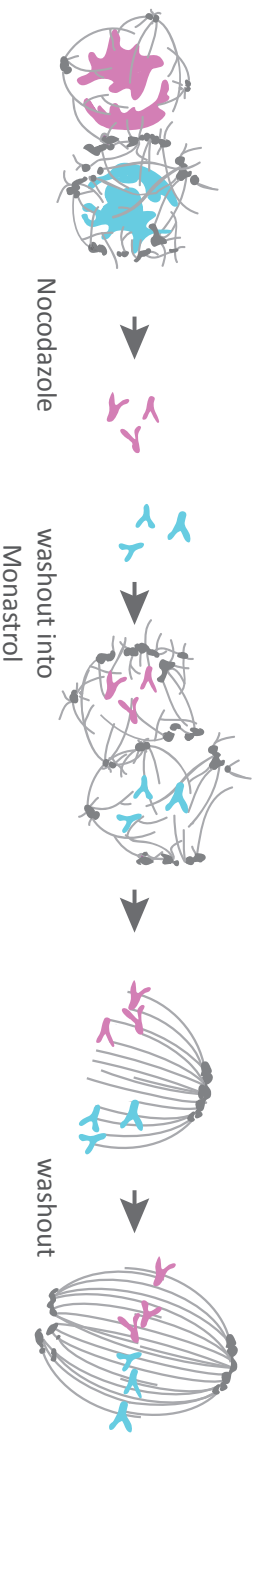

- Maternal Chromosomes
- Paternal Chromosomes
- Pericentrin
- Microtubules

Supplementary Figure 5

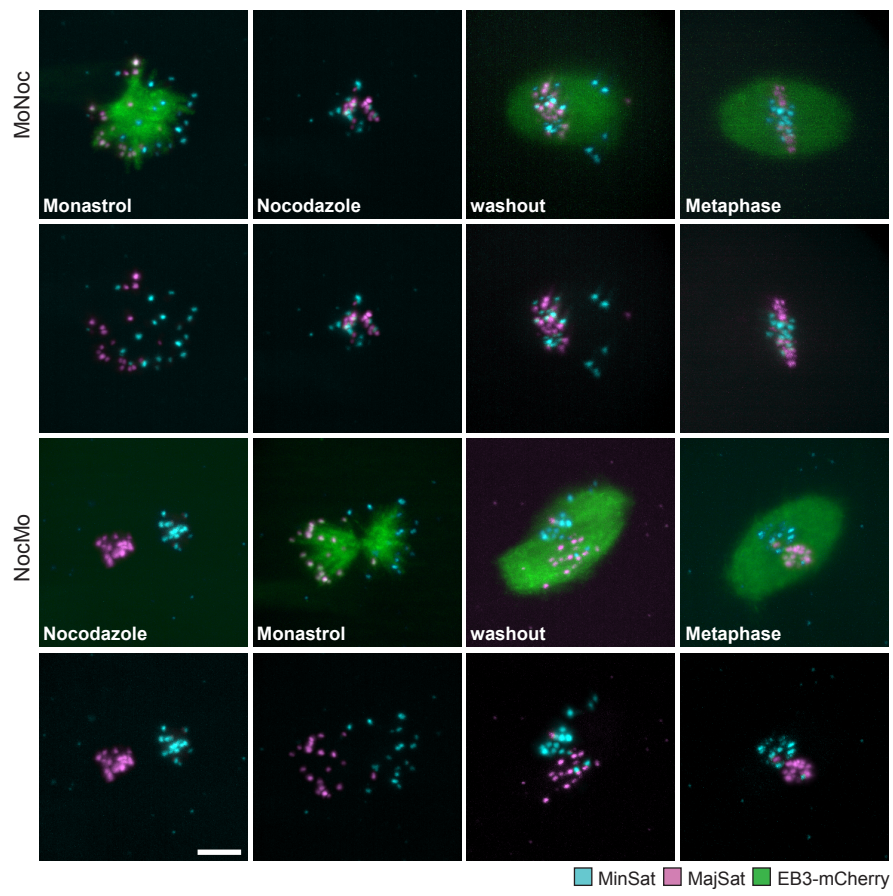

Supplementary Figure 6

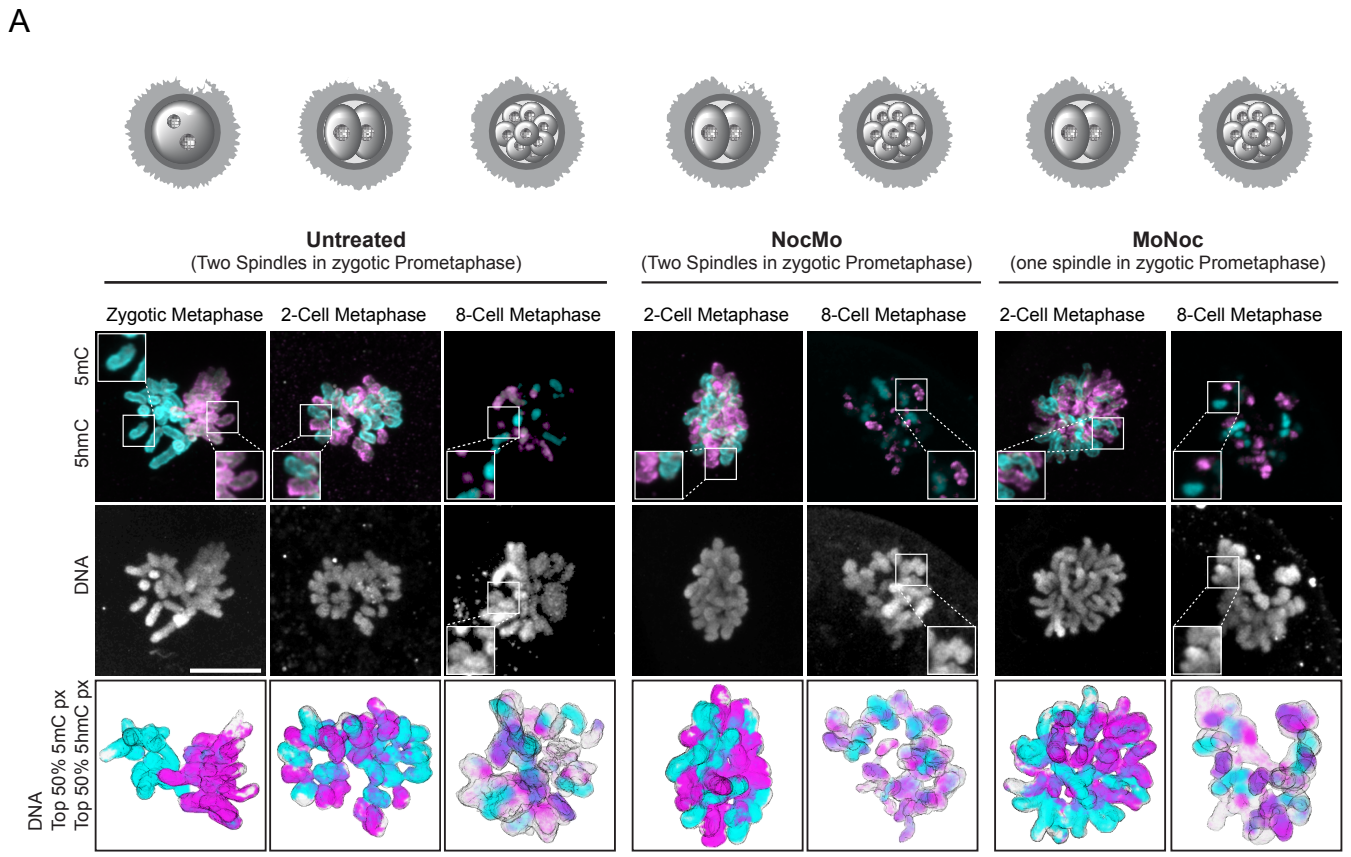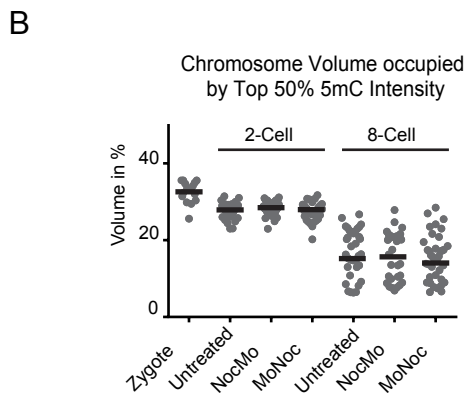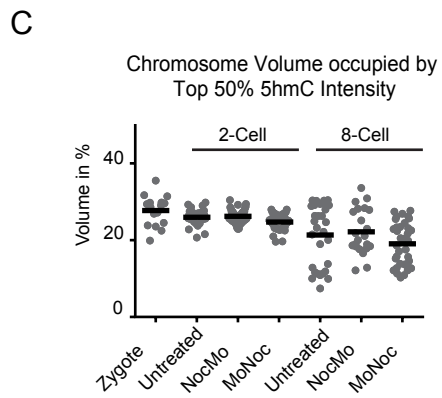

Supplementary Figure 7

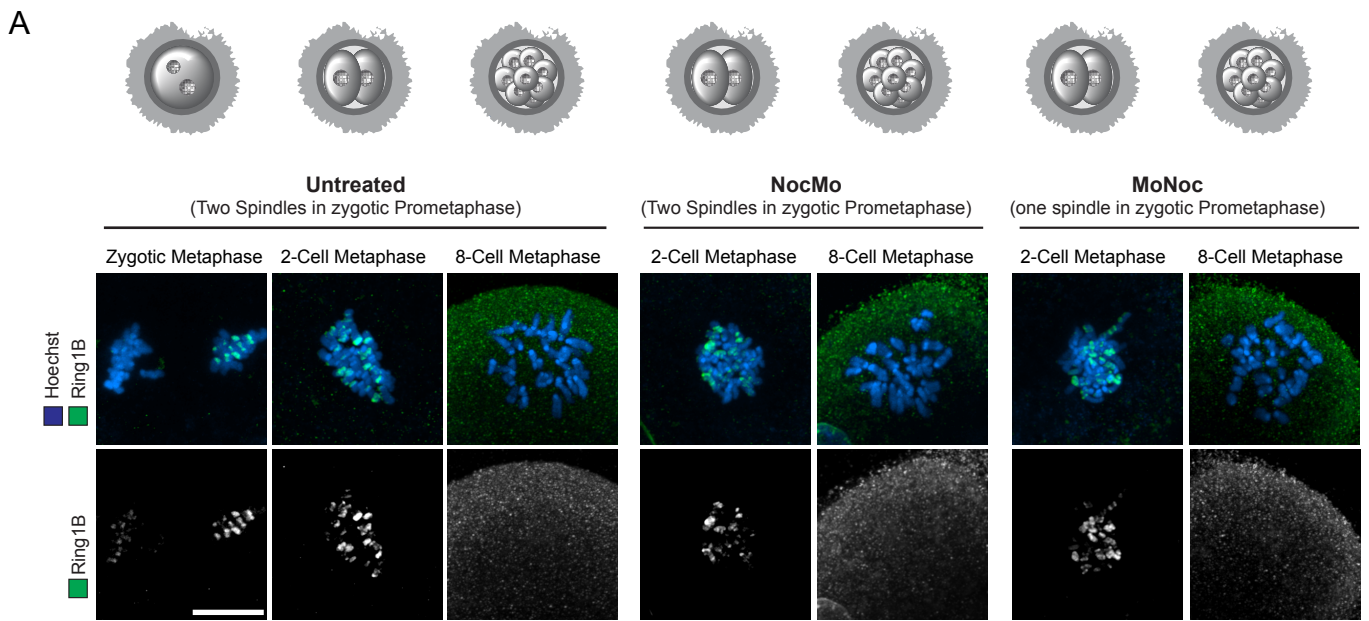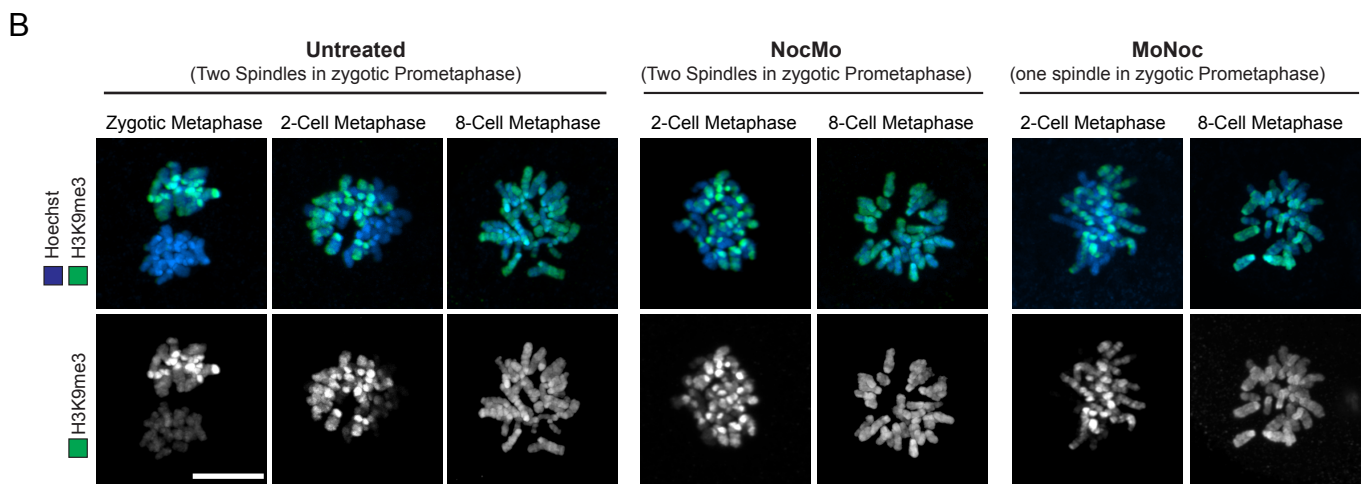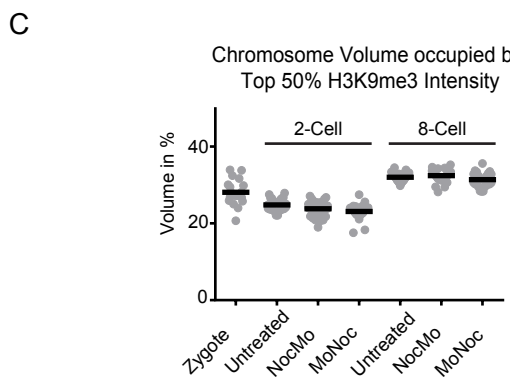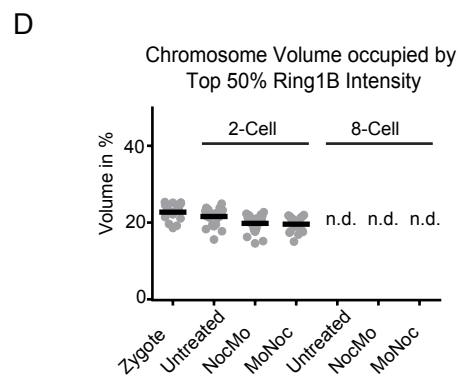

Supplementary Figure 8
